# Supplementary material
Source: publisher site journal article supplement (https://www.spandidos-publications.com/4597/downloadSupplementary)
Supplement: Supplementary file 2 [file downloadSupplementary]

## Sheet: Primers
Table SII. Primers
miRNAs	（5’-3’）
miRNA-484	AACAAGTCAGGCTCAGTCCCC
miRNA-370-3p	GCCTGCTGGGGTGGAACCTG
miRNA-30a-3p	CTTTCAGTCGGATGTTTGCAGC
miRNA-652-3p	AACAAGAATGGCGCCACTAGG
U6	FW: CTCGCTTCGGCAGCACA
	RW: AACGCTTCACGAATTTGCGT
